# Supplementary material for: Association Between Low Muscle Mass and Non-alcoholic Fatty Liver Disease Diagnosed Using Ultrasonography, Magnetic Resonance Imaging Derived Proton Density Fat Fraction, and Comprehensive NAFLD Score in Korea
Source: PubMed Central journal article supplement — J Prev Med Public Health. 2021 Oct 22;54(6):412–21. doi: 10.3961/jpmph.21.387 (PMC8655369; doi:10.3961/jpmph.21.387), 2021-10-22

**Supplemental Material 4. Venn diagram of low muscle mass diagnosis using height, weight, and BMI adjustments**

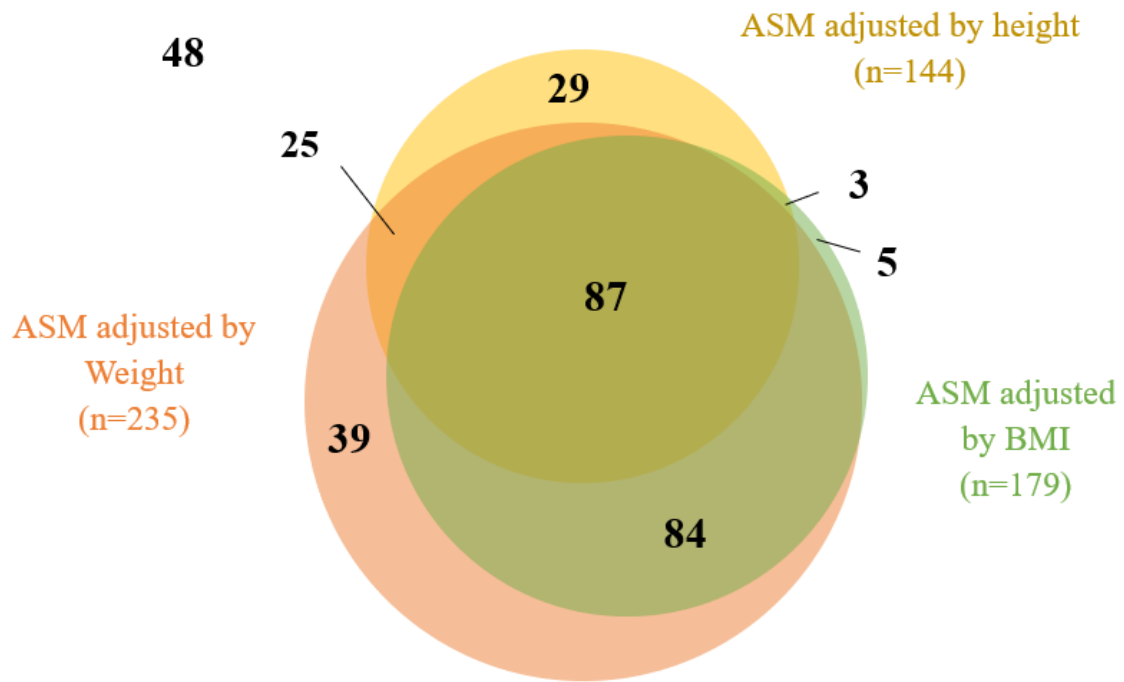

Supplement: jpmph-21-387-suppl4.pdf [file jpmph-21-387-suppl4.pdf]
